# Supplementary material
Source: Elsevier journal article supplement (https://www.sciencedirect.com/science/article/pii/S2174204920302476)
Supplement: mmc1 [file S2174204920302476:mmc1.docx]

**Checklist para Realização de RM Cardíaca em Doentes Portadores de Dispositivos Cardíacos Electrónicos Implantáveis*[[1]](#footnote-1)**

| Nome do paciente | | Data de Nascimento | Numero de identificação hospitalar | |
| --- | --- | --- | --- | --- |
| Tipo e modelo do dispositivo | Pacemaker  CDI  CRT  | | | Data do implante |
| Tipo e modelo de sondas | 1.  2.  3. | | | |

| **Todo o sistema é considerado RM-condicional pela FDA e pela fabricante?**  Sim  - se RM-condicional, por favor responder às questões a preto  Não  - se não RM-condicional, por favor responder a todas as questões | Assinatura |
| --- | --- |

| **Informação Clínica** | | | **Sim** | **Não** |
| --- | --- | --- | --- | --- |
| Dispositivo implantado na região peitoral ou CDI subcutâneo MR-condicional? | | |  |  |
| Dispositivo implantado mais do que 6 semanas antes da data prevista do exame? | | |  |  |
| Excluída presença de elétrodos abandonados ou de componentes adicionais, como adaptadores e extensões de elétrodos  (Na ausência de informação clínica, necessário RX tórax no dia do exame: Sim  Não ) | | |  |  |
| Confirmar que estado de bateria NÃO se encontra em ERI (*elective replacement indicator*) | | |  |  |
| No caso de um sistema não RM-condicional, existe uma indicação clínica clara para a realização do exame (benefício esperado justifica os riscos potenciais)? | | |  |  |
| A duvida clínica não pode ser satisfatoriamente esclarecida por outro método de imagem alternativo? | | |  |  |
| No caso de um CDI não-RM-condicional, o doente apresenta ritmo intrínseco? | | |  |  |
| Dispositivo capaz de realizar *pacing* em modo assíncrono (quando as terapias são desactivadas)? | | |  |  |
| Gerador do dispositivo implantado no ano 2000 ou posteriormente? | | |  |  |
| Médico responsável pela aprovação do exame | Nome: | Assinatura:  Data: | | |

| **Agendamento** | **Sim** | **Não** |
| --- | --- | --- |
| Foi fornecida ao paciente uma cópia do consentimento informado? |  |  |
| O doente concorda com o procedimento? |  |  |
| A informação foi revista e o estudo foi protocolado por Médico Cardiologista/Radiologista? |  |  |
| A clínica de Pacemaker tem conhecimento do agendamento do exame e detalhes do implante? |  |  |

| **Verificação do pacemaker antes do exame** | **Sim** | **Não** |
| --- | --- | --- |
| O sistema foi implantado há mais de 6 semanas? |  |  |
| Dispositivo implantado na região peitoral ou CDI subcutâneo MR-condicional? |  |  |
| Função de alerta sonoro operacional? |  |  |
| Impedância estável? |  |  |
| Limiares de captura bipolar < 2.00V @ 0.40ms? |  |  |
| O doente apresenta ritmo intrínseco com frequência cardíaca > 50 bpm? |  |  |
| O dispositivo foi colocado em modo “MR Safe” |  |  |
| Dispositivo programado em modo apropriado? Modo:____________ |  |  |
| Desactivar outras funções (ex. modo de resposta em frequência, resposta de *pacing* PVC-*triggered*, terapias para a fibrilação auricular,pacing anti-taquicardia, choques) |  |  |
| O dispositivo foi interrogado na clínica de Pacemakers (impedância da sonda, limiares de captura, amplitude da onda P/R, estado de bateria) |  |  |
| O exame foi aprovado pelo departamento de Arritmologia/*Pacing* |  |  |

| **Departamento de Ressonância Magnética** | **Sim** | **Não** |
| --- | --- | --- |
| O médico responsável explicou o procedimento ao doente e forneceu toda a informação relevante (incluindo benefícios e potenciais riscos da RM, tais como interferência electro-magnética, arritmias, disfunção do pacemaker) |  |  |
| O doente forneceu consentimento informado para o exame? |  |  |
| Presença de profissional de saúde com treino em suporte avançado de vida? (médico presente durante o exame em estudos de stress ou dispositivos não RM-condicionais) |  |  |
| Equipamento necessário para suporte avançado de vida disponível em local próximo? |  |  |
| Monitorização de sintomas, ECG, pressão arterial (opcional) e oximetria de pulso |  |  |
| Exame realizado em modo de operação normal (evitar *first level*) |  |  |
| Limitar SAR a 2.0 W/Kg (aumentar TR ou FoV, reduzindo o *flip angle* ou *bandwidth*) |  |  |
| Registar SAR no final do exame:___________ |  |  |
| Exame concretizado sem intercorrências ou complicações? |  |  |

| **Verificação do pacemaker após o exame** | **Sim** | **Não** |
| --- | --- | --- |
| Interrogar dispositivo e comparar com avaliação pré-exame |  |  |
| Restaurar parâmetros de programação originais. |  |  |
| Função de alerta sonoro operacional? |  |  |
| Agendar follow-up em 3 a 6 meses |  |  |

| Médico supervisor responsável pela verificação do formulário | Nome: | Assinatura:  Data: |
| --- | --- | --- |

1. Adaptado a partir de modelo existente no Royal Brompton & Harefield Hospital [↑](#footnote-ref-1)
