# Supplementary material
Source: Elsevier journal article supplement (https://www.sciencedirect.com/science/article/pii/S2174204920302476)
Supplement: mmc2 [file S2174204920302476:mmc2.xlsx]

## Sheet: Sheet1
Tabela 2 – DCEIs RM-condicionais aprovados
Fabricante	Dispositivo	Tipo de compatibilidade	Força do campo magnético	Zonas de restrição
ABBOTT - St Jude	Pacemakers
	Accent MRI e Accent RF MRI	Full-Body	1.5T	Não
	Assurity MRI	Full-Body	3.0T	Não
	Endurity MRI	Full-Body	3.0T	Não
	Endurity (PM 1162, PM 2162)	Full-body	1.5T	Não
	Endurity Core	Full-Body	1.5T	Não
	CDIs
	Ellipse VR e Ellipse DR	Condicional	1.5T	Sim*
	Fortify Assura VR e Fortify Assura DR	Condicional	1.5T	Sim*
	CRT-Ds e CRT-Ps
	Quadra Allure e Quadra Allure MP CRT-P	Full-Body	1.5T	Não
	Quadra Assura e Quadra Assura MP CRT-D	Full-Body	1.5T	Não
	Registador de eventos implantável
	SJM Confirm	Full-Body	1.5T	Não
	SJM Confirm RX	Full-Body	1.5T	Não
BIOTRONIK	Pacemakers
	Enticos 4 = S , SR , D , DR	Full-Body	1.5T	Não
		Condicional	3.0T	Sim*
	Enitra 6 SR-T e Enitra 6 DR-T	Full-Body	1.5T e 3.0T	Não
	Enitra 8 SR-T e Enitra 8 DR-T	Full-Body	1.5T e 3.0T	Não
	Epyra 8 SR-T e Epyra 8 DR-T	Full-Body	1.5T	Não
		Condicional	3.0T	Sim*
	Evia SR-T e Evia DR-T	Full-Body	1.5T	Não
		Condicional	3.0T	Sim*
	CDIs
	Iforia 5 VR-T, VR-T DX e DR-T	Full-Body	1.5T	Não
		Condicional	3.0T	Sim*
	Iforia 7 VR-T, VR-T DX e 7-DR-T	Full-Body	1.5T	Não
		Condicional	3.0T	Sim*
	Intica 5 VR-T, VR-T DX e 5 DR-T	Full-Body	1.5T e 3.0T	Não
	Intica 7 VR-T, VR-T DX e 7 DR-T	Full-Body	1.5T e 3.0T	Não
	Itrevia 5 VR-T, VR-T DX e 5 DR-T	Full-Body	1.5T	Não
		Condicional	3.0T	Sim*
	Itrevia 7 VR-T, VR-T DX e 7 DR-T	Full-Body	1.5T e 3.0T	Não
	Lumax 740 VR-T, DR-T e VR-T DX	Condicional	1.5T	Sim*
	CRT-D
	Iforia 5 HF-T	Full-Body	1.5T	Não
	Iforia 7 HF-T	Full-Body	1.5T	Não
	Intica 5 HF-T	Full-Body	1.5T e 3.0T	Não
	Intica 7 HF-T	Full-Body	1.5T e 3.0T	Não
	Intica 5 HF-T QP	Full-Body	1.5T e 3.0T	Não
	Intica 7 HF-T QP	Full-Body	1.5Te 3.0T	Não
	Itrevia 5 HF-T	Full-Body	1.5T	Não
	Itrevia 7 HF-T	Full-Body	1.5T	Não
	Itrevia 5 HF-T QP	Full-Body	1.5T	Não
	Itrevia 7 HF-T QP	Full-Body	1.5T	Não
	Lumax 740 HF-T	Condicional	1.5T	Sim*
	CRT-P
	Enitra 8 HF-T	Full-Body	1.5T e 3.0T	Não
	Enitra 8 HF-T QP	Full-Body	1.5T e 3.0T	Não
	Epyra 8 HF-T	Condicional	1.5T	Sim*
	Evia HF-T	Condicional	1.5T	Sim*
	Registador de eventos implantável
	Biomonitor	Full-Body	1.5T	Não
	Biomonitor 2-AF	Full-Body	1.5T e 3.0T	Não
BOSTON	Pacemakers	Full-Body		Não
	Accolade MRI	Full-Body	1.5 e 3.0 T	Não
	Advantio MRI	Full-Body	1.5T	Não
	Essentio MRI	Full-Body	1.5 e 3.0T	Não
	Formio MRI	Full-Body	1.5T	Não
	Ingenio MRI	Full-Body	1.5T	Não
	Proponent MRI	Full-Body	1.5 e 3.0 T	Não
	Vitalio MRI	Full-Body	1.5T	Não
	CDIs
	Autogen ICD	Full-Body	1.5T	Não
	Charisma ICD	Full-Body	1.5T	Não
	Dynagen ICD	Full-Body	1.5T	Não
	Emblem S- ICD e Emblem MRI S-ICD	Full-Body	1.5T	Não
	Inogen ICD	Full-Body	1.5T	Não
	Origen ICD e Origen EL ICD	Full-Body	1.5T	Não
	Perciva ICD	Full-Body	1.5T	Não
	Resonate ICD	Full-Body	1.5T	Não
	Vigilant ICD	Full-Body	1.5T	Não
	CRT-Ds
	Autogen X4 CRT-D	Full-Body	1.5T	Não
	Charisma X4 CRT-D	Full-Body	1.5T	Não
	Dynagen X4 CRT-D	Full-Body	1.5T	Não
	Inogen X4 CRT-D	Full-Body	1.5T	Não
	Resonate X4 CRT-D	Full-Body	1.5T	Não
	Vigilant X4 CRT-D	Full-Body	1.5T	Não
	CRT-P
	Visionist X4 CRT-P	Full-Body	1.5 e 3.0T	Não
	Valitude X4 CRT-P	Full-Body	1.5 e 3.0T	Não
MEDTRONIC	Pacemakers
	Advisa MRI	Full-Body	3.0T	Não #
			1.5T	Não &
	Astra XT MRI	Full-Body	3.0T	Não #
			1.5T	Não &
	Attesta MRI	Full-Body	3.0T	Não #
			1.5T	Não &
	Azure S MRI e Azure XT MRI	Full-Body	3.0T	Não #
			1.5T	Não &
	EnRhythm MRI	Full-Body	1.5T	Não &
	Ensura MRI	Full-Body	3.0T	Não #
			1.5T	Não &
	G series MRI	Full-Body	3.0T	Não #
			1.5T	Não &
	Q series MRI	Full-Body	3.0T	Não #
			1.5T	Não &
	Sphera MRI	Full-Body	3.0T	Não #
			1.5T	Não &
	CDIs
	Evera MRI	Full-Body	3.0T	Não #
			1.5T	Não &
	Visia AF MRI	Full-Body	3.0T	Não #
	CRT-Ds e CRT-Ps
	Amplia MRI	Full-Body	3.0T	Não #
			1.5T	Não &
	Amplia MRI Quad	Full-Body	3.0T	Não #
			1.5T	Não &
	Claria MRI e Claria MRI Quad	Full-Body	3.0T	Não #
			1.5T	Não &
	Compia MRI e Compia MRI Quad	Full-Body	3.0T	Não #
			1.5T	Não &
	Percepta e Percepta Quad	Full-Body	3.0T	Não #
			1.5T	Não &
	Serena e Serena Quad	Full-Body	3.0T	Não #
			1.5T	Não &
	Solara e Solara Quad	Full-Body	3.0T	Não #
			1.5T	Não &
	Registador de eventos implantável
	Reveal LinQ	Full-Body	3.0T	Não &
	Reveal XT	Full-Body	3.0T	Não &
MICROPORT	Pacemakers
	Kora 100	Condicional	1.5T	Sim
	Kora 250	Full-Body	1.5T	Não &
	ENO	Full-Body	3T	Não &
	TEO	Full-Body	3T	Não &
	OTO	Full-Body	3T	Não &
& Specific Absorption Rate (SAR) ≤ 2.0 W/kg; Cabeça SAR ≤ 3.2 W/kg
# B1+RMS ≤2.8 µT (quando o isocentro é inferior à C7); Sem restrições no B1+RMS (se isocentro for acima da C7)
Legenda:
DCEIs - dispositivos cardíacos eletrónicos implantáveis
RM - ressonância Magnética
CDI - cardioversor-desfibrilhador implantável
CRT - terapêutica de ressincronização cardíaca
Nota: Independentemente do fabricante, a compatibilidade com Ressonância Magnética requer que o dispositivo e os electródos sejam da mesma marca
