# Supplementary material
Source: Elsevier journal article supplement (https://www.sciencedirect.com/science/article/pii/S2174204920302476)
Supplement: mmc4 [file S2174204920302476:mmc4.docx]

**Consentimento Informado, Livre e Esclarecido**

**para Realização de Ressonância Magnética em portadores de Dispositivos Cardíacos Electrónicos Implantáveis “não RM-condicionais”**

Por favor, leia com atenção todo o conteúdo deste documento.

Não hesite em solicitar mais informações se não estiver completamente esclarecido(a).

A Ressonância Magnética (RM) é um exame de imagem que utiliza campos magnéticos fortes e ondas de radiofrequência para produzir imagens do interior do corpo. É um exame muito seguro e que não utiliza raios X. No entanto, este exame é habitualmente contraindicado em portadores de dispositivos cardíacos implantáveis (como *pacemakers*, desfibrilhadores (CDI) ou dispositivos de ressincronização cardíaca) que não tenham sido desenhados para serem compatíveis com RM. Esta contraindicação resultou de casos de acidentes (alguns deles fatais) que ocorreram com dispositivos antigos e sem uma preparação ou monitorização adequada durante o exame. Nos últimos anos desenvolveram-se métodos para permitir a realização de RM em pessoas com dispositivos cardíacos implantáveis não “compatíveis”, desde que estejam reunidas determinadas condições. Estes métodos incluem uma adequada programação do dispositivo e monitorização contínua durante o exame. Num registo internacional incluindo mais de 1000 doentes que fizeram exames de RM nestas condições controladas não se observou qualquer morte ou evento adverso grave. Por este motivo, considera-se hoje que o risco é suficientemente baixo para que estes exames possam ser realizados, desde que estejam reunidas determinadas condições. Os principais riscos inerentes são:

1. risco de arritmia grave potencialmente fatal (<1:1000) – para reduzir este risco, o seu aparelho será programado de forma apropriada e serão tomadas precauções especiais na programação técnica da sua RM. O seu electrocardiograma será continuamente avaliado durante o exame e, na eventualidade improvável de ocorrer uma arritmia grave, estarão disponíveis os meios humanos e técnicos para o socorrer prontamente;
2. risco de avaria do seu aparelho – para minorar este risco, o seu aparelho será programado de forma apropriada e serão tomadas precauções especiais na programação técnica da RM. No final do exame, o aparelho que tem implantado será testado para avaliar se está a funcionar corretamente. Em casos raros, poderá ser necessário substituir o seu aparelho ou implantar um semelhante.

Poderá obter esclarecimentos adicionais junto do seu médico, do cardiologista responsável pela implantação do seu aparelho, e do médico responsável pelo exame de RM. Os seus médicos apenas recomendarão que realize a RM se entenderem que o benefício potencial do exame é superior ao risco. Em qualquer momento poderá recusar realizar o exame, sem prejuízo de continuar a receber os cuidados de saúde de que necessita.

**MÉDICO**

Confirmo que expliquei à pessoa abaixo indicada, de forma adequada e inteligível, os procedimentos necessários ao ato referido neste documento. Respondi a todas as questões que me foram colocadas e assegurei-me de que houve um período de reflexão suficiente para a tomada da decisão. Também garanti que, em caso de recusa, serão assegurados os melhores cuidados possíveis nesse contexto, no respeito pelos seus direitos.

**Nome legível do médico:** |_________________________________________________|

Data ____/____/______

Assinatura, número de cédula profissional ou número mecanográfico:

(se não aplicável a primeira disposição) ______________________________________

Contacto institucional do médico: _____________________________________________

**UTENTE / REPRESENTANTE LEGAL**

Fui informado dos riscos e potenciais benefícios deste procedimento, cuja realização aceito expressamente. Compreendi que não há garantia absoluta quanto aos resultados do exame. Autorizo a equipa médica e os seus assistentes a realizarem tudo o que considerarem necessário para a concretização do procedimento acima descrito, ou outros que visem o tratamento de eventuais complicações.

Declaro ter compreendido os objetivos de quanto me foi proposto e explicado pelo profissional de saúde que assina este documento, ter-me sido dada oportunidade de fazer todas as perguntas sobre o assunto e para todas elas ter obtido resposta esclarecedora, ter-me sido garantido que não haverá prejuízo para os meus direitos assistenciais se eu recusar esta solicitação, e ter-me sido dado tempo suficiente para refletir sobre esta proposta.

AUTORIZO / NÃO AUTORIZO **(riscar o que não interessa)** os atos indicados, bem como os procedimentos diretamente relacionados que sejam necessários no meu próprio interesse e justificados por razões clínicas fundamentadas.

Local: __________________________________________ Data: ____/____/______

**Nome legível :** |_______________________________________________________|

Processo nº________________

Assinatura ____________________________________________________________

**SE NÃO FOR O PRÓPRIO A ASSINAR POR IDADE OU INCAPACIDADE**

(se o menor tiver discernimento deve também assinar em cima)

NOME:________________________________________________________________

DOC IDENTIFICAÇÃO N.º ________________ DATA VALIDADE ____/____/______

GRAU DE PARENTESCO OU TIPO DE REPRESENTAÇÃO:_____________________

ASSINATURA:__________________________________________________________

Nota: Este documento é feito em duas vias– uma para o processo clínico e outra para ficar na posse de quem consente.
